# Supplementary material for: Synthesis and characterization of a novel, ditopic, reversible and highly selective, “Turn-On” fluorescent chemosensor for Al3+ ion
Source: Royal Society of Chemistry journal article supplement (doi:10.1039/c5ra12040c), 2015-01-01
Supplement: c5ra12040c1.pdf [file c5ra12040c1.pdf]

## Supporting Information

### Synthesis and characterization of a Novel Ditopic, Reversible and Highly Selective “Turn-On” Fluorescent Chemosensor for $\text{Al}^{3+}$ ion

Sayed M. Hossain, Avinash Lakma, Rabindra N. Pradhan, Ayon Chakraborty, Ashis Biswas and Akhilesh K Singh\*

School of Basic Sciences, Indian Institute of Technology Bhubaneswar, Bhubaneswar, 751007, India.

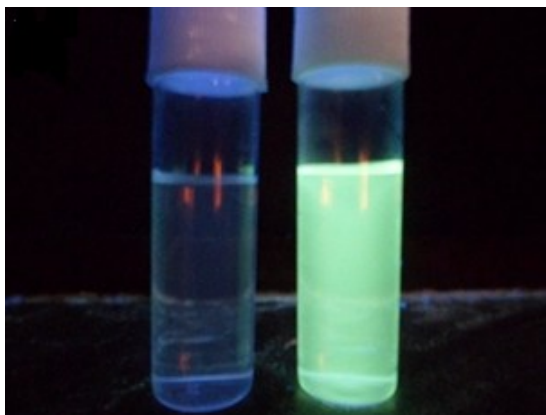

**Fig. S1** Naked eye image of free ligand and its 1:2 aluminium complex in UV light.

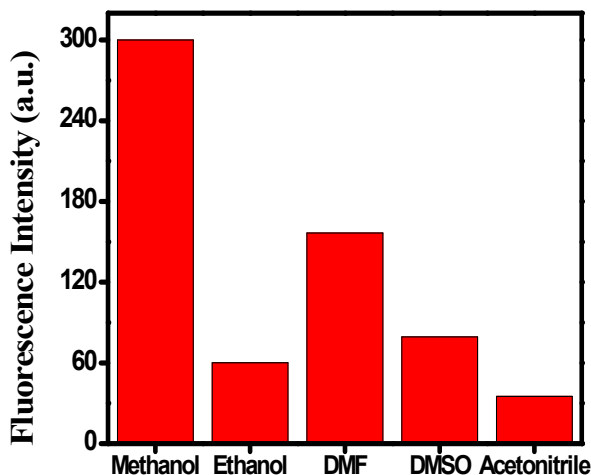

**Fig. S2** Solvent effect on fluorescent intensity of L +  $\text{Al}^{3+}$  probe in different solvent methanol, ethanol, DMF, DMSO and acetonitrile.

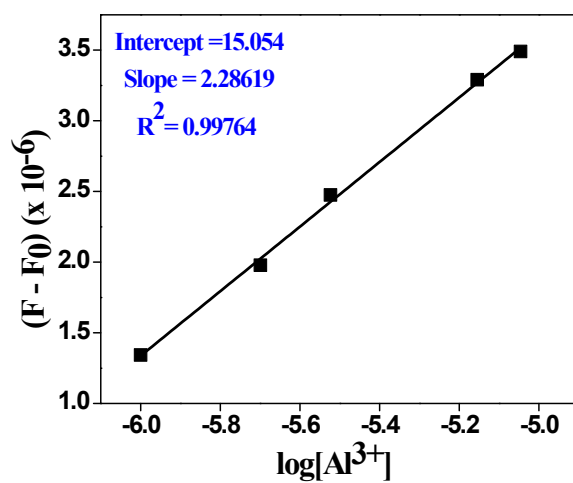

**Fig. S3** The detection limit of L for  $\text{Al}^{3+}$  was estimated from plot of normalized fluorescence change of L vs.  $\log[\text{Al}^{3+}]$

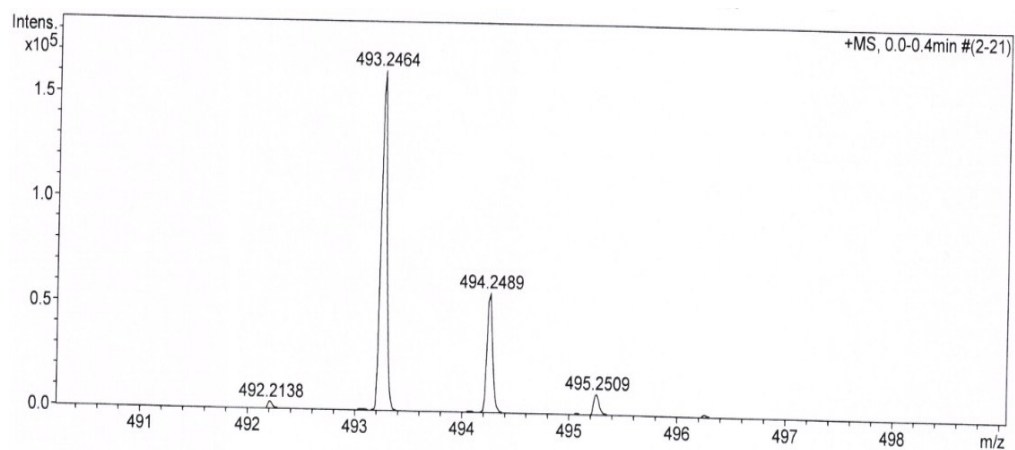

**Fig. S4** ESI-MS spectrum of L in MeOH.

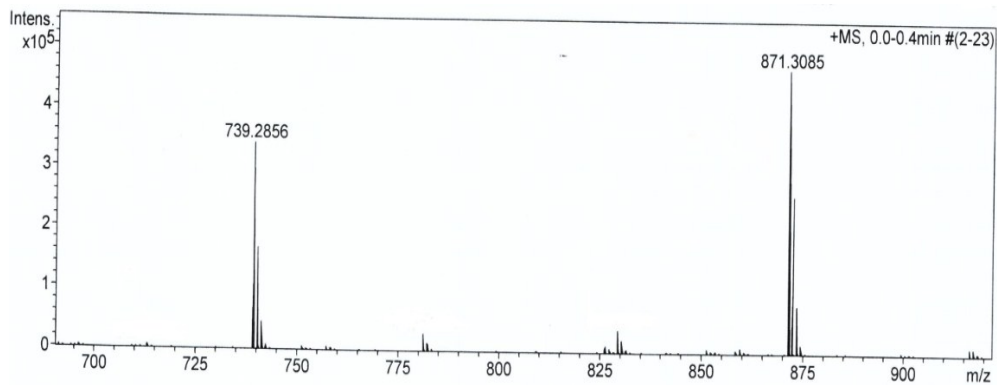

**Fig. S5** ESI-MS spectrum of  $\text{L-Al}^{3+}$  complex in MeOH.

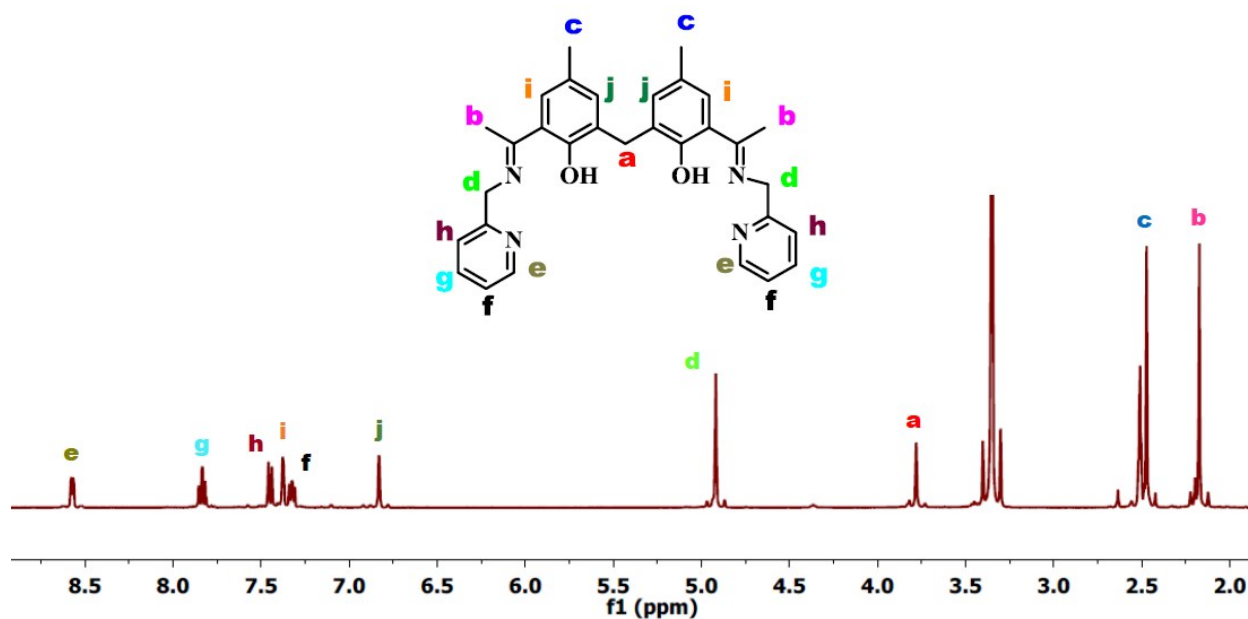

Fig. S6 <sup>1</sup>H NMR spectrum of L in DMSO-d<sub>6</sub>.

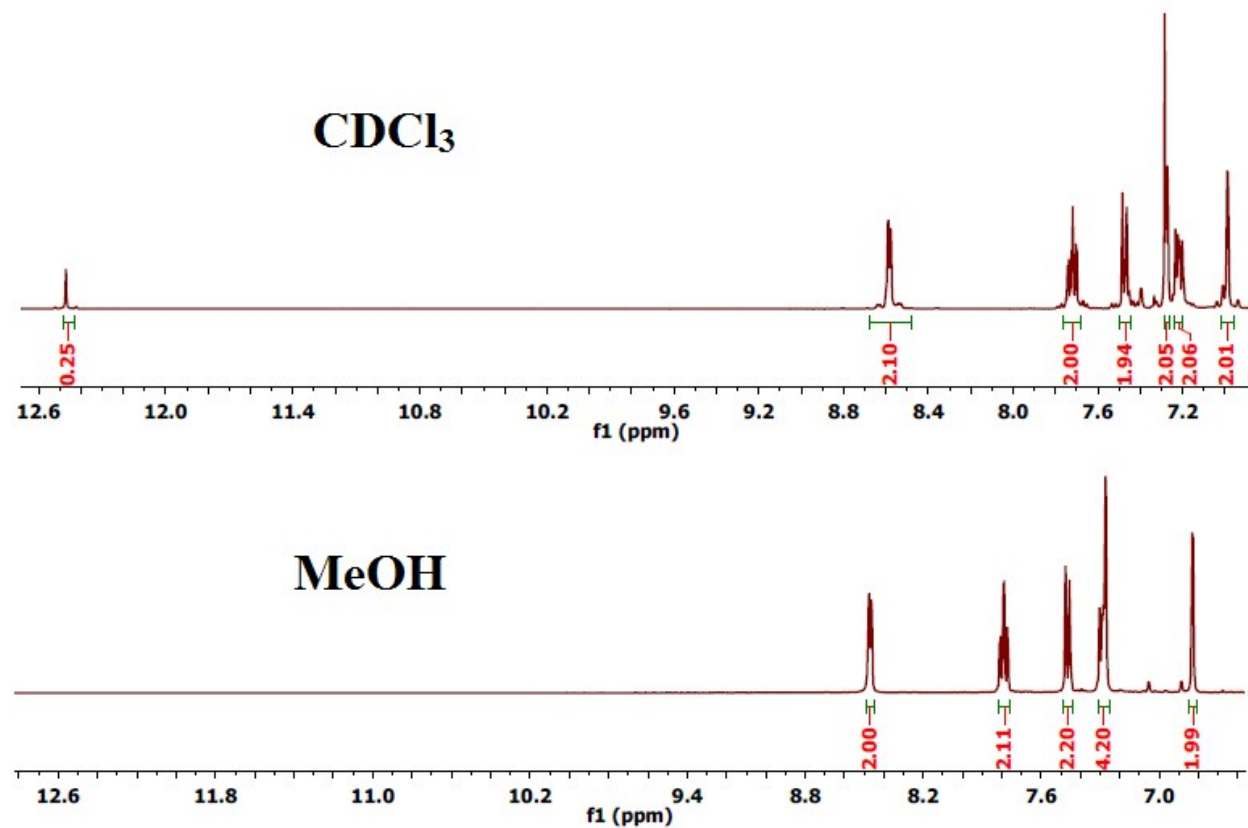

Fig. S7 <sup>1</sup>H NMR of L in both aprotic (CDCl<sub>3</sub>) and protic (methanol-d<sub>4</sub>).

**Table S1.** Crystal data and structure refinement parameters of L.

|                                      |                                                                 |                                                                              |
|--------------------------------------|-----------------------------------------------------------------|------------------------------------------------------------------------------|
| Identification code                  | L                                                               |                                                                              |
| Empirical formula                    | $C_{31}H_{32}N_4O_2$                                            |                                                                              |
| Formula weight                       | 492.61                                                          |                                                                              |
| Temperature                          | 110(0) K                                                        |                                                                              |
| Wavelength                           | 0.71073 Å                                                       |                                                                              |
| Crystal system, space group          | Monoclinic, $P2_1/c$                                            |                                                                              |
| Unit cell dimensions                 | a = 13.0342 (16) Å,<br>b = 11.9408 (15) Å,<br>c = 16.232 (2) Å, | $\alpha = 90.0^\circ$<br>$\alpha = 96.921(3)^\circ$<br>$\alpha = 90.0^\circ$ |
| Volume                               | 2507.8(5) Å <sup>3</sup>                                        |                                                                              |
| Z, Calculated density                | 4, 1.305 mg/m <sup>3</sup>                                      |                                                                              |
| Absorption coefficient               | 0.083 mm <sup>-1</sup>                                          |                                                                              |
| F(000)                               | 1048                                                            |                                                                              |
| Crystal size                         | 0.4 x 0.2 x 0.4 mm <sup>3</sup>                                 |                                                                              |
| Theta range for data collection      | 2.32 to 27.00°                                                  |                                                                              |
| Limiting indices                     | -16 ≤ h ≤ 16, -15 ≤ k ≤ 15, -20 ≤ l ≤ 20                        |                                                                              |
| Reflections collected / unique       | 41229 / 5475 [ $R_{\text{int}} = 0.0608$ ]                      |                                                                              |
| Completeness to theta = 27.00°       | 100.0 %                                                         |                                                                              |
| Absorption correction                | Empirical                                                       |                                                                              |
| Refinement method                    | Full-matrix least-squares on F <sup>2</sup>                     |                                                                              |
| Data / restraints / parameters       | 5475 / 0 / 344                                                  |                                                                              |
| Goodness-of-fit on F <sup>2</sup>    | 1.051                                                           |                                                                              |
| Final R indices [ $I > 2\sigma(I)$ ] | $R_1 = 0.0546$ , $wR_2 = 0.1418$                                |                                                                              |
| R indices (all data)                 | $R_1 = 0.0850$ , $wR_2 = 0.1574$                                |                                                                              |
| Largest diff. peak and hole          | 0.317 and -0.248 e.Å <sup>-3</sup>                              |                                                                              |

**Table S2.** Selected Bond Distances (in Å) and Angles (deg) for L from X-ray.

|            |          |             |          |
|------------|----------|-------------|----------|
| O(1)-C(15) | 1.354(2) | C(12)-H(13) | 0.980(0) |
| O(1)-H(31) | 0.940(3) | C(13)-C(14) | 1.384(2) |
| O(2)-C(23) | 1.354(2) | C(13)-H(14) | 0.950(0) |
| O(2)-H(32) | 0.940(3) | C(14)-C(15) | 1.401(2) |
| N(1)-C(5)  | 1.350(2) | C(14)-C(16) | 1.518(2) |
| N(1)-C(1)  | 1.357(3) | C(16)-C(17) | 1.518(2) |
| N(2)-C(7)  | 1.285(2) | C(16)-H(15) | 0.990(0) |
| N(2)-C(6)  | 1.461(2) | C(16)-H(16) | 0.990(0) |
| N(3)-C(27) | 1.339(3) | C(17)-C(18) | 1.381(2) |
| N(3)-C(31) | 1.342(3) | C(17)-C(23) | 1.397(2) |
| N(4)-C(25) | 1.277(2) | C(18)-C(19) | 1.395(2) |
| N(4)-C(26) | 1.465(2) | C(18)-H(17) | 0.950(0) |
| C(1)-C(2)  | 1.364(3) | C(19)-C(21) | 1.379(3) |
| C(1)-H(1)  | 0.950(0) | C(19)-C(20) | 1.507(2) |
| C(2)-C(3)  | 1.381(3) | C(20)-H(18) | 0.980(0) |

|                  |            |                   |            |
|------------------|------------|-------------------|------------|
| C(2)-H(2)        | 0.950(0)   | C(20)-H(20)       | 0.980(0)   |
| C(3)-C(4)        | 1.359(3)   | C(20)-H(19)       | 0.980(0)   |
| C(3)-H(3)        | 0.950(0)   | C(21)-C(22)       | 1.391(2)   |
| C(4)-C(5)        | 1.364(3)   | C(21)-H(21)       | 0.950(0)   |
| C(4)-H(4)        | 0.950(0)   | C(22)-C(23)       | 1.421(2)   |
| C(5)-C(6)        | 1.509(3)   | C(22)-C(25)       | 1.482(2)   |
| C(6)-H(6)        | 0.990(0)   | C(24)-C(25)       | 1.505(2)   |
| C(6)-H(5)        | 0.990(0)   | C(24)-H(22)       | 0.980(0)   |
| C(7)-C(9)        | 1.480(2)   | C(24)-H(24)       | 0.980(0)   |
| C(7)-C(8)        | 1.504(2)   | C(24)-H(23)       | 0.980(0)   |
| C(8)-H(7)        | 0.980(0)   | C(26)-C(27)       | 1.499(3)   |
| C(8)-H(9)        | 0.980(0)   | C(26)-H(26)       | 0.990(0)   |
| C(8)-H(8)        | 0.980(0)   | C(26)-H(25)       | 0.990(0)   |
| C(9)-C(10)       | 1.396(2)   | C(27)-C(28)       | 1.370(3)   |
| C(9)-C(15)       | 1.415(2)   | C(28)-C(29)       | 1.360(3)   |
| C(10)-C(11)      | 1.382(3)   | C(28)-H(27)       | 0.950(0)   |
| C(10)-H(10)      | 0.950(0)   | C(29)-C(30)       | 1.363(3)   |
| C(11)-C(13)      | 1.395(2)   | C(29)-H(28)       | 0.950(0)   |
| C(11)-C(12)      | 1.506(2)   | C(30)-C(31)       | 1.362(3)   |
| C(12)-H(11)      | 0.980(0)   | C(30)-H(29)       | 0.950(0)   |
| C(12)-H(12)      | 0.980(0)   | C(31)-H(30)       | 0.950(0)   |
| C(15)-O(1)-H(31) | 105.20(17) | C(14)-C(16)-C(17) | 112.46(14) |
| C(23)-O(2)-H(32) | 102.90(17) | C(14)-C(16)-H(15) | 109.10(0)  |
| C(5)-N(1)-C(1)   | 117.60(19) | C(17)-C(16)-H(15) | 109.10(0)  |
| C(7)-N(2)-C(6)   | 121.47(15) | C(14)-C(16)-H(16) | 109.10(0)  |
| C(27)-N(3)-C(31) | 116.90(2)  | C(17)-C(16)-H(16) | 109.10(0)  |
| C(25)-N(4)-C(26) | 120.12(16) | H(15)-C(16)-H(16) | 107.80(0)  |
| N(1)-C(1)-C(2)   | 122.62(19) | C(18)-C(17)-C(23) | 119.19(15) |
| N(1)-C(1)-H(1)   | 118.70(0)  | C(18)-C(17)-C(16) | 120.70(15) |
| C(2)-C(1)-H(1)   | 118.70(0)  | C(23)-C(17)-C(16) | 120.10(15) |
| C(1)-C(2)-C(3)   | 118.03(19) | C(17)-C(18)-C(19) | 122.22(16) |
| C(1)-C(2)-H(2)   | 121.00(0)  | C(17)-C(18)-H(17) | 118.90(0)  |
| C(3)-C(2)-H(2)   | 121.00(0)  | C(19)-C(18)-H(17) | 118.90(0)  |
| C(4)-C(3)-C(2)   | 120.40(2)  | C(21)-C(19)-C(18) | 117.64(16) |
| C(4)-C(3)-H(3)   | 119.80(0)  | C(21)-C(19)-C(20) | 121.21(16) |
| C(2)-C(3)-H(3)   | 119.80(0)  | C(18)-C(19)-C(20) | 121.15(17) |
| C(3)-C(4)-C(5)   | 118.91(18) | C(19)-C(20)-H(18) | 109.50(0)  |
| C(3)-C(4)-H(4)   | 120.50(0)  | C(19)-C(20)-H(20) | 109.50(0)  |
| C(5)-C(4)-H(4)   | 120.50(0)  | H(18)-C(20)-H(20) | 109.50(0)  |
| N(1)-C(5)-C(4)   | 122.43(18) | C(19)-C(20)-H(19) | 109.50(0)  |
| N(1)-C(5)-C(6)   | 116.90(19) | H(18)-C(20)-H(19) | 109.50(0)  |
| C(4)-C(5)-C(6)   | 120.67(18) | H(20)-C(20)-H(19) | 109.50(0)  |
| N(2)-C(6)-C(5)   | 111.04(16) | C(19)-C(21)-C(22) | 122.92(16) |
| N(2)-C(6)-H(6)   | 109.40(0)  | C(19)-C(21)-H(21) | 118.50(0)  |
| C(5)-C(6)-H(6)   | 109.40(0)  | C(22)-C(21)-H(21) | 118.50(0)  |
| N(2)-C(6)-H(5)   | 109.40(0)  | C(21)-C(22)-C(23) | 117.84(16) |
| C(5)-C(6)-H(5)   | 109.40(0)  | C(21)-C(22)-C(25) | 121.67(15) |
| H(6)-C(6)-H(5)   | 108.00(0)  | C(23)-C(22)-C(25) | 120.46(16) |
| N(2)-C(7)-C(9)   | 117.60(15) | O(2)-C(23)-C(17)  | 118.42(15) |
| N(2)-C(7)-C(8)   | 123.52(16) | O(2)-C(23)-C(22)  | 121.48(15) |
| C(9)-C(7)-C(8)   | 118.88(15) | C(17)-C(23)-C(22) | 120.10(16) |
| C(7)-C(8)-H(7)   | 109.50(0)  | C(25)-C(24)-H(22) | 109.50(0)  |
| C(7)-C(8)-H(9)   | 109.50(0)  | C(25)-C(24)-H(24) | 109.50(0)  |

|                   |            |                   |            |
|-------------------|------------|-------------------|------------|
| H(7)-C(8)-H(9)    | 109.50(0)  | H(22)-C(24)-H(24) | 109.50(0)  |
| C(7)-C(8)-H(8)    | 109.50(0)  | C(25)-C(24)-H(23) | 109.50(0)  |
| H(7)-C(8)-H(8)    | 109.50(0)  | H(22)-C(24)-H(23) | 109.50(0)  |
| H(9)-C(8)-H(8)    | 109.50(0)  | H(24)-C(24)-H(23) | 109.50(0)  |
| C(10)-C(9)-C(15)  | 118.67(16) | N(4)-C(25)-C(22)  | 117.60(15) |
| C(10)-C(9)-C(7)   | 120.91(15) | N(4)-C(25)-C(24)  | 122.21(17) |
| C(15)-C(9)-C(7)   | 120.42(15) | C(22)-C(25)-C(24) | 120.18(16) |
| C(11)-C(10)-C(9)  | 121.93(16) | N(4)-C(26)-C(27)  | 109.88(16) |
| C(11)-C(10)-H(10) | 119.00(0)  | N(4)-C(26)-H(26)  | 109.70(0)  |
| C(9)-C(10)-H(10)  | 119.00(0)  | C(27)-C(26)-H(26) | 109.70(0)  |
| C(10)-C(11)-C(13) | 118.06(16) | N(4)-C(26)-H(25)  | 109.70(0)  |
| C(10)-C(11)-C(12) | 121.14(16) | C(27)-C(26)-H(25) | 109.70(0)  |
| C(13)-C(11)-C(12) | 120.79(16) | H(26)-C(26)-H(25) | 108.20(0)  |
| C(11)-C(12)-H(11) | 109.50(0)  | N(3)-C(27)-C(28)  | 121.61(19) |
| C(11)-C(12)-H(12) | 109.50(0)  | N(3)-C(27)-C(26)  | 116.80(2)  |
| H(11)-C(12)-H(12) | 109.50(0)  | C(28)-C(27)-C(26) | 121.50(2)  |
| C(11)-C(12)-H(13) | 109.50(0)  | C(29)-C(28)-C(27) | 120.20(2)  |
| H(11)-C(12)-H(13) | 109.50(0)  | C(29)-C(28)-H(27) | 119.90(0)  |
| H(12)-C(12)-H(13) | 109.50(0)  | C(27)-C(28)-H(27) | 119.90(0)  |
| C(14)-C(13)-C(11) | 122.46(16) | C(28)-C(29)-C(30) | 119.00(2)  |
| C(14)-C(13)-H(14) | 118.80(0)  | C(28)-C(29)-H(28) | 120.50(0)  |
| C(11)-C(13)-H(14) | 118.80(0)  | C(30)-C(29)-H(28) | 120.50(0)  |
| C(13)-C(14)-C(15) | 118.74(16) | C(31)-C(30)-C(29) | 118.10(2)  |
| C(13)-C(14)-C(16) | 120.87(15) | C(31)-C(30)-H(29) | 121.00(0)  |
| C(15)-C(14)-C(16) | 120.39(15) | C(29)-C(30)-H(29) | 121.00(0)  |
| O(1)-C(15)-C(14)  | 118.36(15) | N(3)-C(31)-C(30)  | 124.10(2)  |
| O(1)-C(15)-C(9)   | 121.50(15) | N(3)-C(31)-H(30)  | 117.90(0)  |
| C(14)-C(15)-C(9)  | 120.14(15) | C(30)-C(31)-H(30) | 117.90(0)  |
